# Supplementary material for: Extending the family of heteroditopic calix[4]diquinone receptors for cooperative AND ion-pair recognition
Source: Royal Society of Chemistry journal article supplement (doi:10.1039/c1nj20708c), 2011-10-28
Supplement: c1nj20708c.pdf [file c1nj20708c.pdf]

# Extending the Family of Heteroditopic Calix[4]diquinone Receptors for Cooperative AND Ion-Pair Recognition

Anna J. McConnell, Christopher J. Serpell, and Paul D. Beer

## Supplementary Information

### Table of Contents

|                                                  |           |
|--------------------------------------------------|-----------|
| <b>Part I: Figures</b> .....                     | <b>2</b>  |
| <b>Part II: Crystallographic Data</b> .....      | <b>5</b>  |
| X-Ray Crystal Structure of Receptor 1 .....      | 5         |
| X-Ray Crystal Structure of Receptor 3 .....      | 6         |
| X-Ray Crystal Structure of Precursor 12 .....    | 7         |
| X-Ray Crystal Structure of Macrocycle 17 .....   | 8         |
| <b>Part III: Titration Protocols</b> .....       | <b>9</b>  |
| <sup>1</sup> H NMR Spectroscopy Titrations ..... | 9         |
| UV/visible Spectroscopy Titrations .....         | 10        |
| Electrochemistry Titrations .....                | 10        |
| <b>Part IV: References</b> .....                 | <b>11</b> |

## Part I: Figures

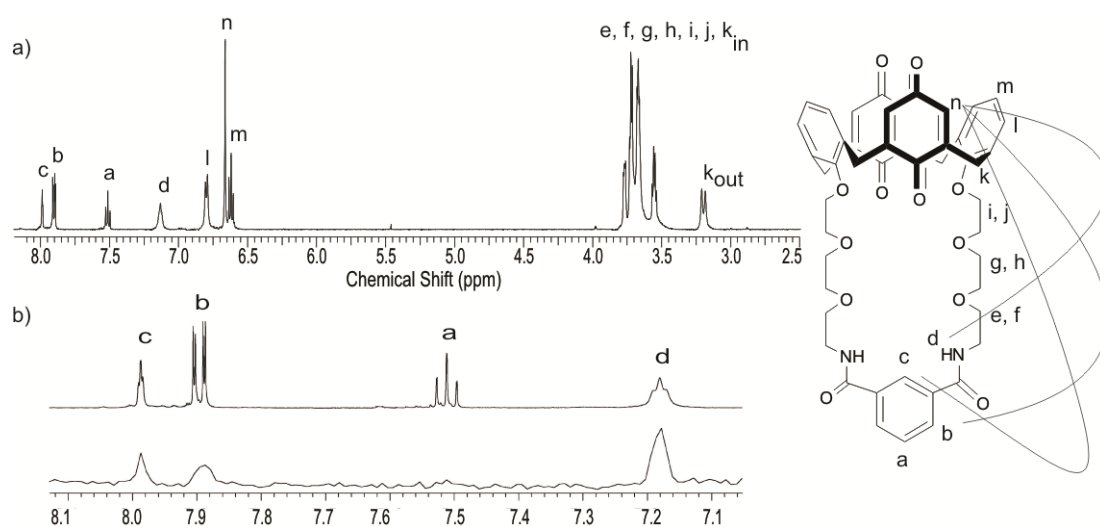

**Figure S1** a)  $^1\text{H}$  NMR spectrum of receptor **5** in  $\text{CD}_3\text{CN}$  at 298 K and b) ROESY analysis showing correlations between proton *n* of the calix[4]diquinone unit and protons *b-d* of the anion binding unit.

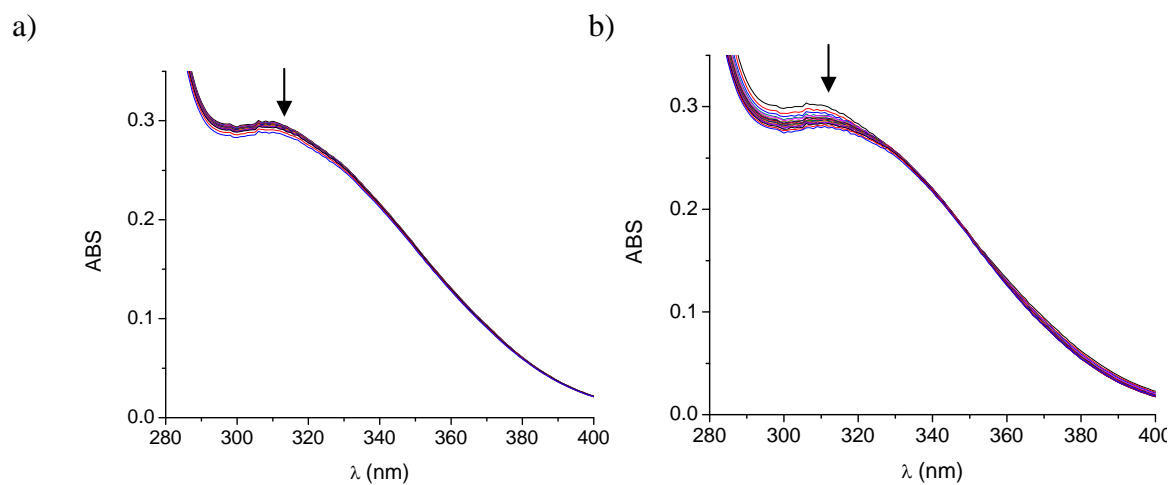

**Figure S2** Changes in the absorbance of receptor **4** upon addition of  $\text{NH}_4^+$  cations in the a) absence and b) presence of one equivalent of chloride ions in  $\text{CH}_3\text{CN}$  at 298 K.

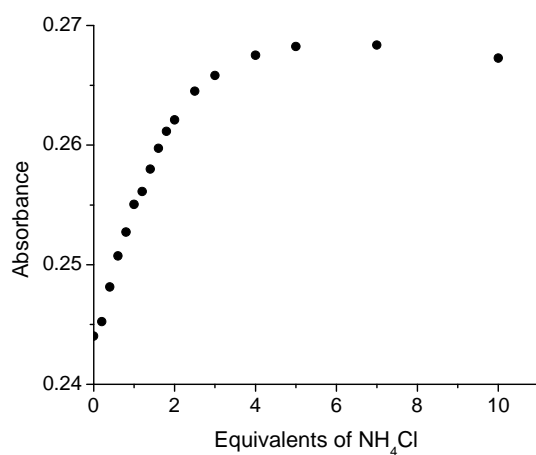

**Figure S3** Variation in the absorbance upon addition of aqueous NH<sub>4</sub>Cl to receptor **1** in 0.5% H<sub>2</sub>O/CH<sub>3</sub>CN at 298 K.

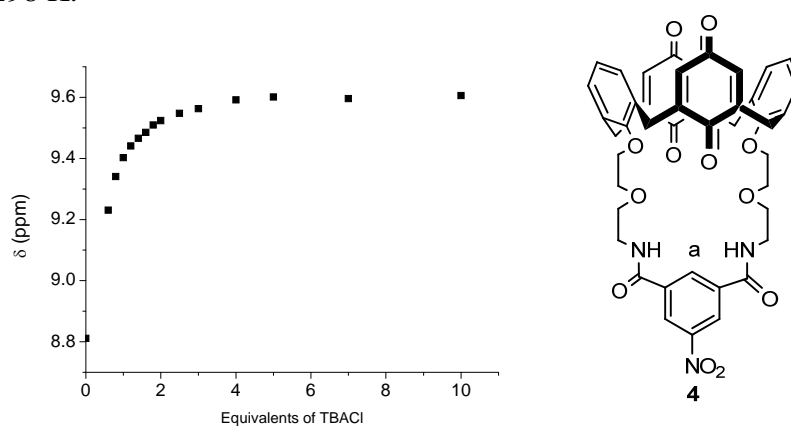

**Figure S4** Chemical shift changes of the isophthaloyl proton *a* of receptor **4** upon addition of TBACl in the presence of one equivalent of NH<sub>4</sub>PF<sub>6</sub> in 98:2 CD<sub>3</sub>CN/D<sub>2</sub>O at 298 K.

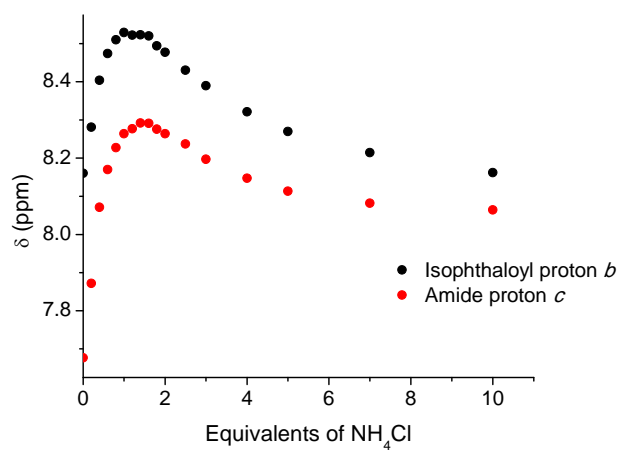

**Figure S5** Variation in the chemical shift of isophthaloyl proton *b* and amide proton *c* upon addition of aqueous NH<sub>4</sub>Cl to receptor **1** in 0.5% H<sub>2</sub>O/CD<sub>3</sub>CN at 298 K.

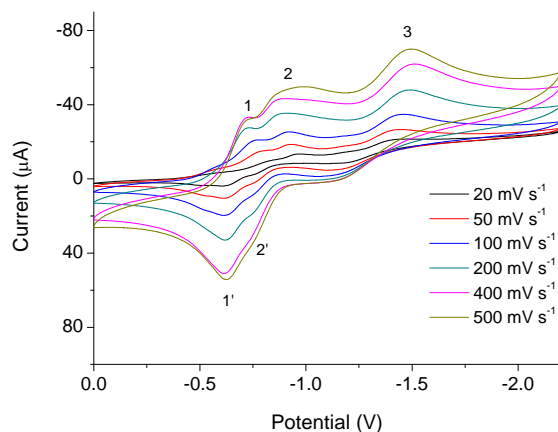

**Figure S6** CVs of receptor **5** at different scan rates in  $\text{CH}_3\text{CN}$  at 298 K. Conditions: 4 mM solution of receptor **5**, 0.1 M  $\text{TBAPF}_6$  supporting electrolyte, glassy carbon working electrode, platinum auxiliary electrode,  $\text{Ag}/\text{AgCl}$  reference electrode.

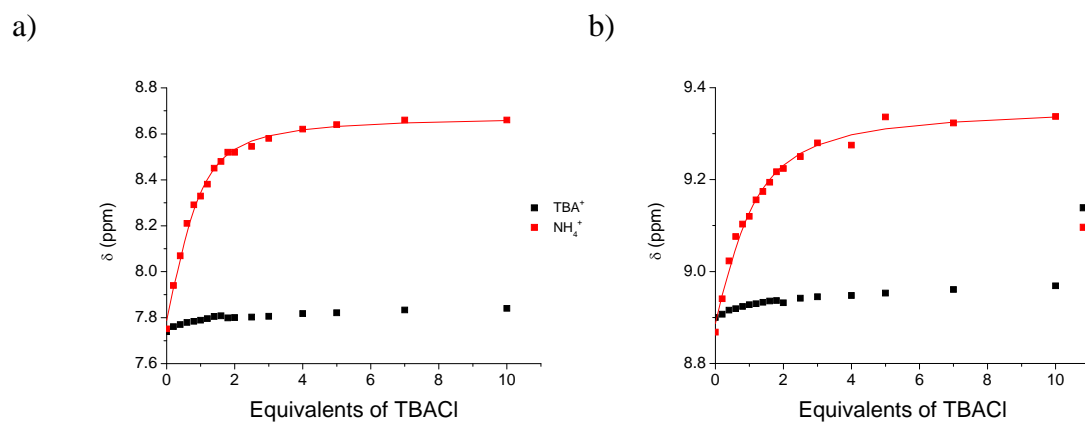

**Figure S7** Chemical shift change of the amide proton upon addition of TBACl in the presence and absence of coordinating ammonium cations to a solution of a) receptor **1** and b) receptor **2** at 298 K in 98:2  $\text{CD}_3\text{CN}/\text{D}_2\text{O}$ . Square symbols represent the experimental data points and the lines represent the calculated curves

## Part II: Crystallographic Data

### X-Ray Crystal Structure of Receptor 1

Single crystals of receptor **1** were grown by slow evaporation of a CH<sub>2</sub>Cl<sub>2</sub> solution.

**Table S1** Crystallographic data for receptor **1**

|                                                   |                                                                |
|---------------------------------------------------|----------------------------------------------------------------|
| Crystal identification                            | 5503                                                           |
| Chemical formula                                  | C <sub>56</sub> H <sub>64</sub> N <sub>2</sub> O <sub>10</sub> |
| Formula weight                                    | 925.09                                                         |
| Temperature (K)                                   | 150                                                            |
| Wavelength (Å)                                    | 0.71073                                                        |
| Crystal system                                    | Triclinic                                                      |
| Space group                                       | P-1                                                            |
| <i>a</i> (Å)                                      | 13.4651(3)                                                     |
| <i>b</i> (Å)                                      | 13.4770(3)                                                     |
| <i>c</i> (Å)                                      | 13.6637(4)                                                     |
| $\alpha$ (°)                                      | 98.499(1)                                                      |
| $\beta$ (°)                                       | 93.210(1)                                                      |
| $\gamma$ (°)                                      | 98.034(1)                                                      |
| Cell volume (Å <sup>3</sup> )                     | 2420.79(10)                                                    |
| <i>Z</i>                                          | 2                                                              |
| Calculated density (Mg/m <sup>3</sup> )           | 1.269                                                          |
| Absorption coefficient (mm <sup>-1</sup> )        | 0.087                                                          |
| <i>F</i> <sub>000</sub>                           | 988                                                            |
| Crystal size (mm)                                 | 0.12 x 0.10 x 0.09                                             |
| Description of crystal                            | Clear intense yellow block                                     |
| Absorption correction                             | Semi-empirical from equivalents                                |
| Transmission coefficients (min, max)              | 0.992, 0.923                                                   |
| $\theta$ range for data collection (°)            | 5.10 ≤ $\theta$ ≤ 27.42                                        |
| Index ranges                                      | -17 ≤ <i>h</i> ≤ 17, -17 ≤ <i>k</i> ≤ 17, -17 ≤ <i>l</i> ≤ 17  |
| Reflections measured                              | 17257                                                          |
| Unique reflections                                | 10797                                                          |
| <i>R</i> <sub>int</sub>                           | 0.0669                                                         |
| Observed reflections ( <i>I</i> > 2σ( <i>I</i> )) | 5572                                                           |
| Refinement method                                 | Full-matrix least-squares on <i>F</i> <sup>2</sup>             |

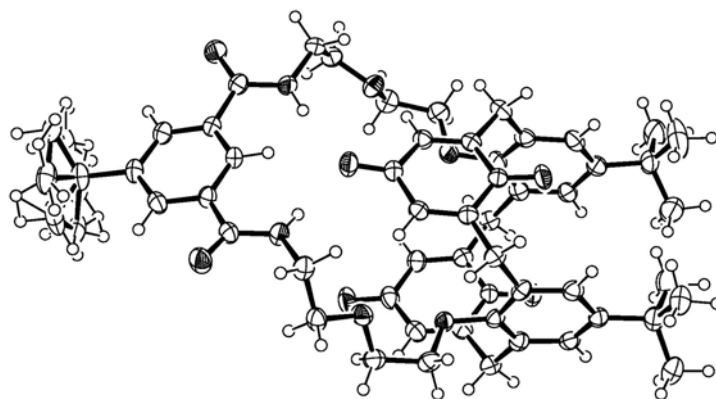

**Figure S8** ORTEP thermal ellipsoid plot of the single crystal structure of receptor **1** at 50% probability. Solvent has been omitted for clarity.

## X-Ray Crystal Structure of Receptor 3

Single crystals of receptor **3** were grown by slow evaporation of a CHCl<sub>3</sub>/CH<sub>3</sub>CN solvent mixture.

**Table S2** Crystallographic data for receptor **3**

|                                                          |                                                                                                                                |
|----------------------------------------------------------|--------------------------------------------------------------------------------------------------------------------------------|
| Crystal identification                                   | 014CJS09                                                                                                                       |
| Chemical formula                                         | C <sub>44</sub> H <sub>40</sub> N <sub>2</sub> O <sub>10</sub> ·0.96(CHCl <sub>3</sub> )·0.54(C <sub>2</sub> H <sub>3</sub> N) |
| Formula weight                                           | 893.34                                                                                                                         |
| Temperature (K)                                          | 150                                                                                                                            |
| Wavelength (Å)                                           | 0.71073                                                                                                                        |
| Crystal system                                           | Triclinic                                                                                                                      |
| Space group                                              | P-1                                                                                                                            |
| <i>a</i> (Å)                                             | 11.5030 (3)                                                                                                                    |
| <i>b</i> (Å)                                             | 13.4039 (4)                                                                                                                    |
| <i>c</i> (Å)                                             | 14.5562 (5)                                                                                                                    |
| $\alpha$ (°)                                             | 76.3517 (14)                                                                                                                   |
| $\beta$ (°)                                              | 82.0783 (15)                                                                                                                   |
| $\gamma$ (°)                                             | 81.4218 (14)                                                                                                                   |
| Cell volume (Å <sup>3</sup> )                            | 2144.24 (11)                                                                                                                   |
| <i>Z</i>                                                 | 2                                                                                                                              |
| Calculated density (Mg/m <sup>3</sup> )                  | 1.384                                                                                                                          |
| Absorption coefficient (mm <sup>-1</sup> )               | 0.27                                                                                                                           |
| <i>F</i> <sub>000</sub>                                  | 930.900                                                                                                                        |
| Crystal size (mm)                                        | 0.24 × 0.12 × 0.10                                                                                                             |
| Description of crystal                                   | Yellow block                                                                                                                   |
| Absorption correction                                    | Multi-scan DENZO/SCALEPACK <sup>1</sup>                                                                                        |
| Transmission coefficients (min, max)                     | 0.85, 0.97                                                                                                                     |
| $\theta$ range for data collection (°)                   | 5.2 ≤ $\theta$ ≤ 27.5                                                                                                          |
| Index ranges                                             | -13 ≤ <i>h</i> ≤ 14, -17 ≤ <i>k</i> ≤ 17, -18 ≤ <i>l</i> ≤ 16                                                                  |
| Reflections measured                                     | 30051                                                                                                                          |
| Unique reflections                                       | 9701                                                                                                                           |
| <i>R</i> <sub>int</sub>                                  | 0.075                                                                                                                          |
| Observed reflections ( <i>I</i> > 2σ( <i>I</i> ))        | 6290                                                                                                                           |
| Refinement method                                        | Full-matrix least-squares on <i>F</i> <sup>2</sup>                                                                             |
| Parameters refined                                       | 604                                                                                                                            |
| Weighting scheme                                         | Modified Sheldrick                                                                                                             |
| Goodness of fit                                          | 1.0                                                                                                                            |
| <i>R</i>                                                 | 0.066                                                                                                                          |
| <i>wR</i>                                                | 0.175                                                                                                                          |
| Residual electron density (min, max) (eÅ <sup>-3</sup> ) | -0.6, 0.6                                                                                                                      |

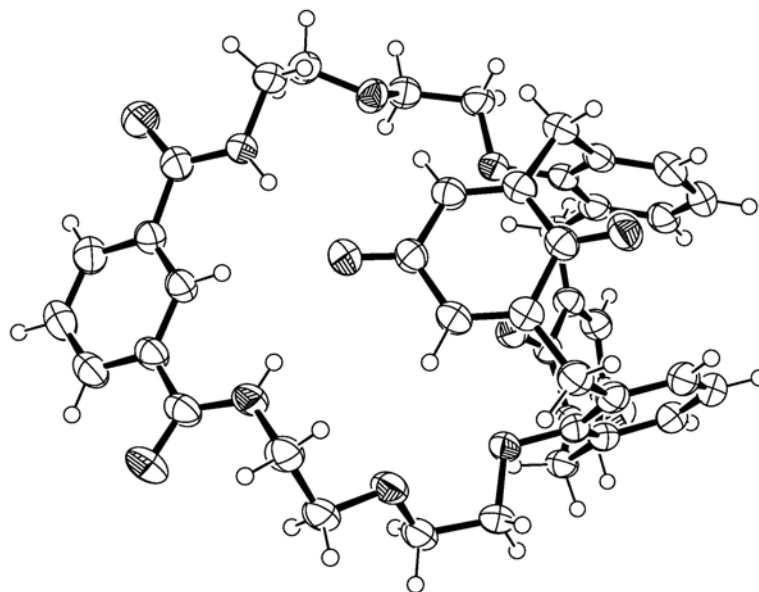

**Figure S9** ORTEP thermal ellipsoid plot of the single crystal structure of receptor **3** at 50% probability. Solvent has been omitted for clarity.

## X-Ray Crystal Structure of Precursor **12**

Single crystals of precursor **12** were grown by slow evaporation of an EtOAc/hexane mixture.

**Table S3** Crystallographic data for precursor **12**

|                                            |                                                                |
|--------------------------------------------|----------------------------------------------------------------|
| Crystal identification                     | 5378                                                           |
| Chemical formula                           | C <sub>52</sub> H <sub>46</sub> N <sub>2</sub> O <sub>10</sub> |
| Formula weight                             | 858.94                                                         |
| Temperature (K)                            | 150                                                            |
| Wavelength (Å)                             | 0.71073                                                        |
| Crystal system                             | Monoclinic                                                     |
| Space group                                | <i>P</i> 2 <sub>1</sub> / <i>c</i>                             |
| <i>a</i> (Å)                               | 12.5858(2)                                                     |
| <i>b</i> (Å)                               | 20.2654(2)                                                     |
| <i>c</i> (Å)                               | 17.1345(2)                                                     |
| $\alpha$ (°)                               | 90                                                             |
| $\beta$ (°)                                | 99.8495(5)                                                     |
| $\gamma$ (°)                               | 90                                                             |
| Cell volume (Å <sup>3</sup> )              | 4305.85(10)                                                    |
| <i>Z</i>                                   | 4                                                              |
| Calculated density (Mg/m <sup>3</sup> )    | 1.325                                                          |
| Absorption coefficient (mm <sup>-1</sup> ) | 0.092                                                          |
| <i>F</i> <sub>000</sub>                    | 1808                                                           |
| Crystal size (mm)                          | 0.28 x 0.34 x 0.42                                             |
| Description of crystal                     | Colourless block                                               |
| Absorption correction                      | Semi-empirical from equivalent reflections                     |
| Transmission coefficients (min, max)       | 0.96, 0.97                                                     |
| $\theta$ range for data collection (°)     | 5.0 ≤ $\theta$ ≤ 27.5                                          |
| Index ranges                               | -16 ≤ <i>h</i> ≤ 16, 0 ≤ <i>k</i> ≤ 26, 0 ≤ <i>l</i> ≤ 22      |
| Reflections measured                       | 49220                                                          |

|                                                                    |                                  |
|--------------------------------------------------------------------|----------------------------------|
| Unique reflections                                                 | 10052                            |
| $R_{\text{int}}$                                                   | 0.045                            |
| Observed reflections ( $I > 3\sigma(I)$ )                          | 5775                             |
| Refinement method                                                  | Full-matrix least-squares on $F$ |
| Parameters refined                                                 | 585                              |
| Weighting scheme                                                   | Chebyshev 3-term polynomial      |
| Goodness of fit                                                    | 1.1083                           |
| $R$                                                                | 0.0350                           |
| $wR$                                                               | 0.0393                           |
| Residual electron density (min, max) ( $\text{e}\text{\AA}^{-3}$ ) | -0.17, 0.20                      |

---

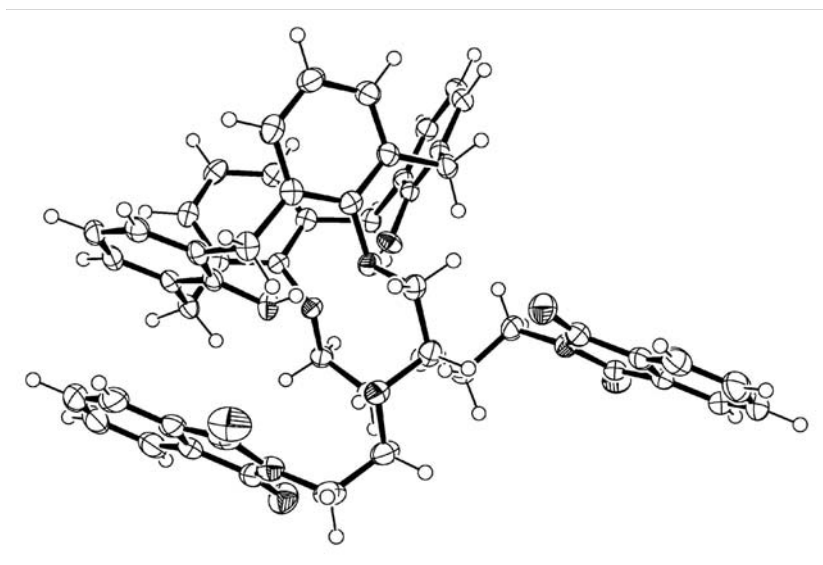

**Figure S10** ORTEP thermal ellipsoid plot of the single crystal structure of precursor **12** at 50% probability. Solvent has been omitted for clarity.

## X-Ray Crystal Structure of Macrocycle **17**

Single crystals of macrocycle **17** were grown by slow evaporation of an EtOAc/acetone mixture.

**Table S4** Crystallographic data for macrocycle **17**

---

|                                               |                                                                                                                           |
|-----------------------------------------------|---------------------------------------------------------------------------------------------------------------------------|
| Crystal identification                        | 5386                                                                                                                      |
| Chemical formula                              | $\text{C}_{44}\text{H}_{43}\text{N}_3\text{O}_{10} \cdot \text{H}_2\text{O} \cdot 0.5(\text{C}_5\text{H}_{10}\text{O}_2)$ |
| Formula weight                                | 842.92                                                                                                                    |
| Temperature (K)                               | 150                                                                                                                       |
| Wavelength ( $\text{\AA}$ )                   | 0.71073                                                                                                                   |
| Crystal system                                | Monoclinic                                                                                                                |
| Space group                                   | P21/a                                                                                                                     |
| $a$ ( $\text{\AA}$ )                          | 13.3790 (1)                                                                                                               |
| $b$ ( $\text{\AA}$ )                          | 15.0967 (2)                                                                                                               |
| $c$ ( $\text{\AA}$ )                          | 20.7767 (3)                                                                                                               |
| $\alpha$ ( $^\circ$ )                         | 90                                                                                                                        |
| $\beta$ ( $^\circ$ )                          | 103.7671 (5)                                                                                                              |
| $\gamma$ ( $^\circ$ )                         | 90                                                                                                                        |
| Cell volume ( $\text{\AA}^3$ )                | 4075.89 (9)                                                                                                               |
| $Z$                                           | 4                                                                                                                         |
| Calculated density ( $\text{Mg}/\text{m}^3$ ) | 1.374                                                                                                                     |



|                                                          |                                          |
|----------------------------------------------------------|------------------------------------------|
| Absorption coefficient (mm <sup>-1</sup> )               | 0.10                                     |
| F <sub>000</sub>                                         | 1784                                     |
| Crystal size (mm)                                        | 0.44 × 0.32 × 0.20                       |
| Description of crystal                                   | Colourless plate                         |
| Absorption correction                                    | Multi-scan DENZO/SCALEPACK <sup>1</sup>  |
| Transmission coefficients (min, max)                     | 0.82, 0.98                               |
| θ range for data collection (°)                          | 5.0 ≤ θ ≤ 29                             |
| Index ranges                                             | -18 ≤ h ≤ 18, -20 ≤ k ≤ 20, -28 ≤ l ≤ 28 |
| Reflections measured                                     | 87793                                    |
| Unique reflections                                       | 10734                                    |
| R <sub>int</sub>                                         | 0.069                                    |
| Observed reflections (I > 2σ(I))                         | 6235                                     |
| Refinement method                                        | Full-matrix least-squares on F           |
| Parameters refined                                       | 559                                      |
| Weighting scheme                                         | Modified Sheldrick                       |
| Goodness of fit                                          | 1.08                                     |
| R                                                        | 0.052                                    |
| wR                                                       | 0.06                                     |
| Residual electron density (min, max) (eÅ <sup>-3</sup> ) | -0.58, 0.39                              |

---

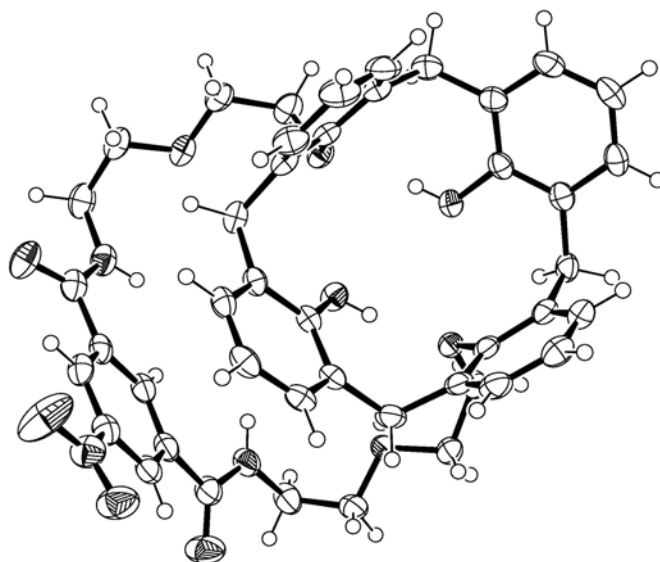

**Figure S11** ORTEP thermal ellipsoid plot of the single crystal structure of macrocycle **17** at 50% probability. Solvent has been omitted for clarity.

## Part III: Titration Protocols

### <sup>1</sup>H NMR Spectroscopy Titrations

<sup>1</sup>H NMR spectra were recorded on a Varian Unity Plus 500 spectrometer at 298 K. Anion binding titration studies were carried out by titrating a solution of the guest anion as its tetrabutylammonium salt (TBAX) into a solution of the host species. The initial sample volume was 500 μL, the starting concentration of the host species was 1.5 mM and the concentration of the anion solution was 0.075 M. Seventeen aliquots of the anion solution were added until a total of 10 equivalents of anion had been added. The following volumes of anion were added: 10 x 2 μL, 2 x 5 μL, 2 x 10 μL, 1 x 20 μL, 1 x 30 μL. After each addition

the solution was thoroughly shaken and the  $^1\text{H}$  NMR spectrum was recorded monitoring the changes in the chemical shift of the ortho pyridinium proton of the host.

The resulting titration data were analysed using the winEQNMR2<sup>2</sup> computer program. The observed chemical shift data, host and guest concentrations at each titration point and estimates for the binding constant, limiting chemical shifts and complex stoichiometry were added to the input file. The parameters were refined by non-linear least-squares analysis to achieve the best fit between the observed and calculated chemical shifts. The parameters were varied until values for the association constant converged. There was good agreement between the experimental and calculated binding curves which demonstrated that the model was appropriate.

## UV/visible Spectroscopy Titrations

UV/visible spectra were recorded on a Perkin-Elmer Lambda 19 spectrometer or a Shimadzu UV-2401PC spectrometer at 298 K. Cation binding titration studies were carried out by titrating a solution of the guest cation as its hexafluorophosphate or perchlorate salt into a solution of the host species. Where necessary, a 1:1 mixture of the host and TBACl was also prepared. The initial sample volume was 3 mL, the starting concentration of the host species was 0.1 mM and the concentration of the cation solution was 0.03 M. Seventeen aliquots of the cation solution were added until a total of 10 equivalents of cation had been added. The following volumes of cation were added: 10 x 2  $\mu\text{L}$ , 2 x 5  $\mu\text{L}$ , 2 x 10  $\mu\text{L}$ , 1 x 20  $\mu\text{L}$ , 1 x 30  $\mu\text{L}$ . After each addition, the UV/visible spectrum was recorded monitoring changes of the calix[4]diquinone  $n-\pi^*$  absorption band.

The resulting titration data were analysed using the SPECFIT<sup>3</sup> computer program. The spectra, host and guest concentrations at each titration point, complex stoichiometry and whether the component species were coloured were included in the input file. The parameters were refined by global analysis using singular value decomposition and non-linear modelling by the Levenberg-Marquardt method. The parameters were varied until values for the association constant converged. There was good agreement between the experimental and calculated binding curves, calculated concentration profiles and calculated spectra of the complexes, demonstrating that the model was appropriate.

## Electrochemistry Titrations

Electrochemical studies on selected calix[4]diquinone receptors were carried out using square wave and cyclic voltammetric techniques. Voltammograms were recorded under a  $\text{N}_2$  atmosphere at 298 K using a glassy carbon working electrode, platinum auxiliary electrode and Ag/AgCl reference electrode connected to a Potentiostat (Autolab PGSTAT12 using GPES software). Square wave voltammograms were recorded at 30 MHz and cyclic voltammograms were recorded at 100  $\text{mV s}^{-1}$ , unless specified otherwise. The starting concentration of the host species was 4 mM in dry degassed  $\text{CH}_3\text{CN}$ , with 0.1 M TBAPF<sub>6</sub> as the supporting electrolyte, and the initial sample volume was 2.5 mL. Titrations were carried out by titrating a 0.25 M solution of the guest species ( $\text{NaClO}_4$ , KPF<sub>6</sub> or TBACl) into a solution of the host species. Four aliquots of the guest species were added until a total of 5 equivalents of guest had been added. The following volumes of guest were added: 2 x 5  $\mu\text{L}$ , 2 x 10  $\mu\text{L}$ , 1 x 20  $\mu\text{L}$ . In some cases, four aliquots of another guest species were added to investigate ion-pair recognition. After each addition, the square wave and cyclic voltammograms were recorded monitoring potential changes of the calix[4]diquinone redox waves.

## Part IV: References

1. Z. Otwinowski and W. Minor, *Methods in Enzymology*, Eds. C. W. Carter Jr. and R. M. Sweet, Academic Press, New York, 1997.
2. M. J. Hynes, *J. Chem. Soc., Dalton Trans.*, 1993, 311-312.
3. SPECFIT v. 2.02, Spectrum Software Associates, Chapel Hill, NC.
